# Supplementary material for: Salt-Induced Tissue-Specific Cytosine Methylation Downregulates Expression of HKT Genes in Contrasting Wheat (Triticum aestivum L.) Genotypes
Source: PubMed Central journal article supplement — DNA Cell Biol. 2017 Apr 1;36(4):283–94. doi: 10.1089/dna.2016.3505 (PMC5385449; doi:10.1089/dna.2016.3505), 2017-04-01
Supplement: Supp_Figure1.pdf [file Supp_Figure1.pdf]

**Supplementary Figure S1:** Sequence search analysis (BLAST) for the partial *HKT1;4* gene cloned from bread wheat genotype (A) Kharchia-65 and (B) HD-2329.

**A**

**BLAST Results**

**HKT1;4-Kharchia-65**

**RID** [UNVNHVA3016](#) (Expires on 08-11 17:06 pm)  
**Query ID** Id|Query\_82223  
**Description** None  
**Molecule type** nucleic acid  
**Query Length** 583  
**Database Name** nr  
**Description** Nucleotide collection (nt)  
**Program** BLASTN 2.5.0+

**Graphic Summary**

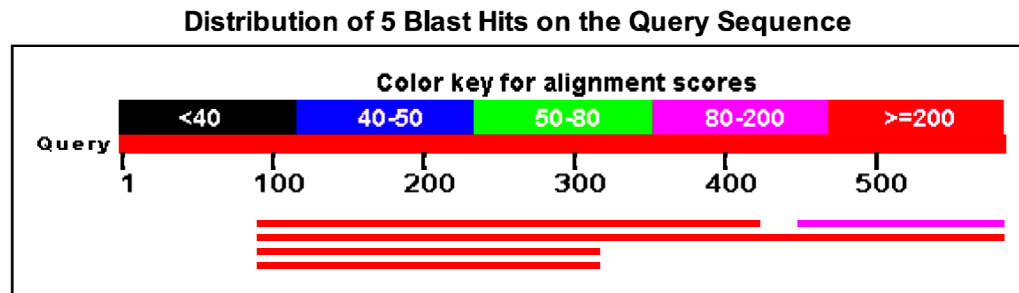

**Descriptions**

Sequences producing significant alignments:

| Description                                                                              | Max score | Total score | Query cover | E value | Ident | Accession                  |
|------------------------------------------------------------------------------------------|-----------|-------------|-------------|---------|-------|----------------------------|
| Triticum aestivum partial mRNA for HKT protein (HKT1,4.1 gene)                           | 551       | 551         | 56%         | 7e-153  | 97%   | <a href="#">HG934161.1</a> |
| Hordeum vulgare subsp. spontaneum high-affinity K+ transporter 4 gene, complete sequence | 472       | 472         | 84%         | 5e-129  | 84%   | <a href="#">HQ696002.1</a> |
| → Triticum durum HKT1;4-2 mRNA, complete cds                                             | 311       | 311         | 38%         | 1e-80   | 92%   | <a href="#">KF443079.1</a> |
| Triticum durum HKT1;4-1 mRNA, complete cds                                               | 311       | 311         | 38%         | 1e-80   | 92%   | <a href="#">KF443078.1</a> |
| Triticum monococcum putative sodium transporter HKT7-A2 (HKT7-A2) mRNA, complete cds     | 183       | 183         | 23%         | 3e-42   | 91%   | <a href="#">EF062819.1</a> |

## Alignments

Triticum aestivum partial mRNA for HKT protein (HKT1,4,1 gene)

Sequence ID: **emb|HG934161.1|** Length: 331 Number of Matches: 1  
Range 1: 1 to 331

| Score         | Expect   | Identities   | Gaps      | Strand    | Frame |
|---------------|----------|--------------|-----------|-----------|-------|
| 551 bits(298) | 7e-153() | 320/331(97%) | 0/331(0%) | Plus/Plus |       |

Features:

|       |     |                                                               |     |
|-------|-----|---------------------------------------------------------------|-----|
| Query | 92  | GTACCTGCCTCCATACACCACATGGTTTCCATTTGAGGAGAGCTCGGGCGTGAAGGACCA  | 151 |
| Sbjct | 1   | GTACCTGCCTCCATACACCACATGGTTTCCATTTGAGGAGAGCTCGGGCGTGAAGGACCA  | 60  |
| Query | 152 | TCCCACGGAGGAGACCCCGGGGGTCAAGGTTGCTCAAGAGCACGGCTCTGTACAACCTCTC | 211 |
| Sbjct | 61  | TCCCACGGAGGAGACCCAGGGGAGCAGGTTGCTCAAGAGCACGGCTCTGTACAACCTCTC  | 120 |
| Query | 212 | CTACCTCGCCATCTTCATCATCGCCATCTGCGTCACCGAAAGGGAAAACCTCGAGGAAGA  | 271 |
| Sbjct | 121 | CTACCTCGCCATCTTCATCATCGCCATCTGCGTCACCGAGAGGGAAAACCTCGAGGAAAA  | 180 |
| Query | 272 | CCCCCTCAACTTCAGCTTGTCTCAGCATCGTCGTCGAAGTCGTCAGGCAAGCCCTTCTAA  | 331 |
| Sbjct | 181 | CCCCCTCAACTTCAGCTTGTCTCAGCATCGTCGTCGAAGTCGTCAGGCAAGCCCTTCTAA  | 240 |
| Query | 332 | CGCAAATCAAAAAAGCCTGAAAACGAATAACAAATATGACTGCTACTTACTTCCGGCGTT  | 391 |
| Sbjct | 241 | CGCAAATCAAGAAAAGCCTGAAAACGAATAACAAATATGACTGCAACTTAGTCCGGCATT  | 300 |
| Query | 392 | GTTGGTTTCCCTTCATGGAAGCTGACATGTTT                              | 422 |
| Sbjct | 301 | ATTGGTTTCCCTTCATGGAAGCTGACATAATTT                             | 331 |

Hordeum vulgare subsp. spontaneum high-affinity K<sup>+</sup> transporter 4 gene, complete sequence

Sequence ID: **gb|HQ696002.1|** Length: 2473 Number of Matches: 1  
Range 1: 487 to 973

| Score         | Expect   | Identities   | Gaps       | Strand    | Frame |
|---------------|----------|--------------|------------|-----------|-------|
| 472 bits(255) | 5e-129() | 418/496(84%) | 14/496(2%) | Plus/Plus |       |

Features:

|       |     |                                                               |     |
|-------|-----|---------------------------------------------------------------|-----|
| Query | 92  | GTACCTGCCTCCATACACCACATGGTTTCCATTTGAGGAGAGCTCGGGCGTGAAGGACCA  | 151 |
| Sbjct | 487 | GTACCTGCCTCCATACACGACATGGTTTCCATTCCAAGAGAGCTCCATCGTGGCAGACCA  | 546 |
| Query | 152 | TCCCACGGAGGAGACCCCGGGGGTCAAGGTTGCTCAAGAGCACGGCTCTGTACAACCTCTC | 211 |
| Sbjct | 547 | CCCCACGAAGGAGACCCAGGGGCTCAGGCTGCTCAAGAGCGCGCTTCTGTACAACCTCTC  | 606 |
| Query | 212 | CTACCTCGCCATCTTCATCATCGCCATCTGCGTCACCGAAAGGGAAAACCTCGAGGAAGA  | 271 |
| Sbjct | 607 | CTACCTCGCCATCTTCGTCGTCGCCATCTGCGTCACCGAGAGGGAAAACCTAGAGGAAGA  | 666 |
| Query | 272 | CCCCCTCAACTTCAGCTTGTCTCAGCATCGTCGTCGAAGTCGTCAGGCAAGCCCC-TTCTA | 330 |
| Sbjct | 667 | CCCGCTCAACTTCAGCTTGTCTCAGCGTCGTCGTCGAAGTCGTCAGGCAAGCCCCACTCCA | 726 |
| Query | 331 | ACGCAAATCAAAAAAGCCTGAAAACGAATAACAAATATGACTGCTACTTACTTCCGGCGT  | 390 |
| Sbjct | 727 | AAGCAAATC-GAGAA-CCTGAAAACGAATAA---AGACGAATACAGCTTCATTCTCTGC-- | 779 |

```

Query 391 TGTGGTTTCCCTTCAT----GGAAGCTGACATGTTTTATCCTTACATTCGCGAGTGCGG 446
Sbjct 780 -GTTGATTTCCCTTCATGGAAGGAAGCTGACATGTTTGTCTTTCACATTCGCGAGCGCTT 838
Query 447 ATGGAAATGGGGGCTTCTCCATGGGCTACAGTTGCAATAGACAGATCAGCCCGGACGCGC 506
Sbjct 839 ACGGAAATGTGGGCTTCTCCATGGGCTACAGCTGCAGTAGACGGATCAACCTGGACCGGG 898
Query 507 TGTGCACCGACGGGTGGACCGGCTTCGTGGGAGGTGGAGTGATCTGGCAAGCTCATCC 566
Sbjct 899 TGTGCCTCGACAGGTGGACCGGCTTCGCCGGAAGGTGGAGCGATCTGGCAAGCTCATCC 958
Query 567 TCATTCGTTGTGATGC 582
Sbjct 959 TCATTC-TTGTAAATGC 973

```

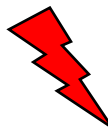

Triticum durum HKT1;4-2 mRNA, complete cds

Sequence ID: **gb|KF443079.1|** Length: 1686 Number of Matches: 1

Range 1: 1263 to 1487

| Score         | Expect                                                         | Identities   | Gaps      | Strand    | Frame |
|---------------|----------------------------------------------------------------|--------------|-----------|-----------|-------|
| 311 bits(168) | 1e-80()                                                        | 206/225(92%) | 0/225(0%) | Plus/Plus |       |
| Features:     |                                                                |              |           |           |       |
| Query 92      | GTACCTGCCTCCATACACCACATGGTTTCCATTTGAGGAGAGCTCGGGCGTGAAGGACCA   | 151          |           |           |       |
| Sbjct 1263    | GTACCTCCCTCCATACACGACATGGTTTCCATTTGGAGAGAGCTCCAGCGTGAAGGACCA   | 1322         |           |           |       |
| Query 152     | TCCCACGGAGGAGACCCCGGGGGTCAAGTTGCTCAAGAGCACGGCTCTGTCACTCAACTCTC | 211          |           |           |       |
| Sbjct 1323    | TCCCACGGAGGAGACCCAGGGGGTCAAGTTGCTCAAGAGCACGGCTCTGTCACTCAACTCTC | 1382         |           |           |       |
| Query 212     | CTACCTCGCCATCTTTCATCATCGCCATCTGCGTCAACCGAAAGGGAAAACCTCGAGGAAGA | 271          |           |           |       |
| Sbjct 1383    | CTACCTTGCCATCTTTGTTCATCGCCATCTGCGTCACTGAGAGGGAAAAGCTCAAGGAGGA  | 1442         |           |           |       |
| Query 272     | CCCCCTCAACTTCAGCTTGCTCAGCATCGTTCGTCGAAGTCGTCAG                 | 316          |           |           |       |
| Sbjct 1443    | CCCCCTCAACTTCAACTTGCTCAGCATCGTTCGTCGAAGTCGTCAG                 | 1487         |           |           |       |

Triticum durum HKT1;4-1 mRNA, complete cds

Sequence ID: **gb|KF443078.1|** Length: 1692 Number of Matches: 1

Range 1: 1269 to 1493

| Score         | Expect                                                         | Identities   | Gaps      | Strand    | Frame |
|---------------|----------------------------------------------------------------|--------------|-----------|-----------|-------|
| 311 bits(168) | 1e-80()                                                        | 206/225(92%) | 0/225(0%) | Plus/Plus |       |
| Features:     |                                                                |              |           |           |       |
| Query 92      | GTACCTGCCTCCATACACCACATGGTTTCCATTTGAGGAGAGCTCGGGCGTGAAGGACCA   | 151          |           |           |       |
| Sbjct 1269    | GTACCTGCCTCCATACACGACGTGGTTTCCATTTGAAGAGAGCTCCGGCGTCAAGGACCA   | 1328         |           |           |       |
| Query 152     | TCCCACGGAGGAGACCCCGGGGGTCAAGTTGCTCAAGAGCACGGCTCTGTCACTCAACTCTC | 211          |           |           |       |
| Sbjct 1329    | ACCCAGGGAGGAGACCCAGGGGGTCAAGCTGCTCAAGAGCACGGCTCTGTCACTCAACTCTC | 1388         |           |           |       |
| Query 212     | CTACCTCGCCATCTTTCATCATCGCCATCTGCGTCAACCGAAAGGGAAAACCTCGAGGAAGA | 271          |           |           |       |
| Sbjct 1389    | CTACCTCGCCATCTTTGTTCATCGCCATCTGCATCAACCGAGAGGGAAAAGCTCAAGGAGGA | 1448         |           |           |       |
| Query 272     | CCCCCTCAACTTCAGCTTGCTCAGCATCGTTCGTCGAAGTCGTCAG                 | 316          |           |           |       |
| Sbjct 1449    | CCCCCTCAACTTCAACTTGCTCAGCATCGTTCGTCGAAGTCGTCAG                 | 1493         |           |           |       |

## B

### BLAST Results

HKT1;4-HD-2329

RID [UNUYUR6X01R](#) (Expires on 08-11 16:54 pm)

Query ID [Icl|Query\\_91553](#)  
Description None  
Molecule type nucleic acid  
Query Length 581

Database Name nr  
Description Nucleotide collection (nt)  
Program BLASTN 2.5.0+

### Graphic Summary

Distribution of 5 Blast Hits on the Query Sequence

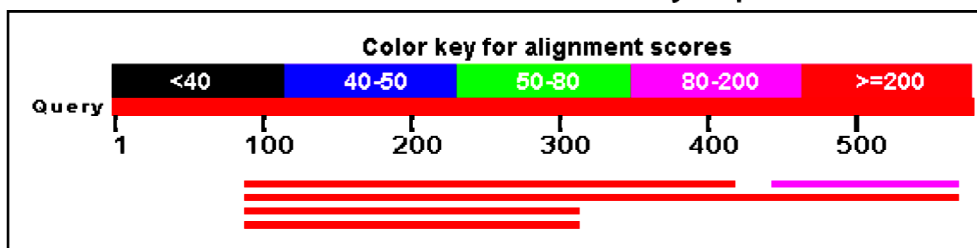

### Descriptions

Sequences producing significant alignments:

| Description                                                                              | Max score | Total score | Query cover | E value | Ident | Accession                  |
|------------------------------------------------------------------------------------------|-----------|-------------|-------------|---------|-------|----------------------------|
| Triticum aestivum partial mRNA for HKT protein (HKT1,4.1 gene)                           | 529       | 529         | 56%         | 3e-146  | 95%   | <a href="#">HG934161.1</a> |
| Hordeum vulgare subsp. spontaneum high-affinity K+ transporter 4 gene, complete sequence | 453       | 453         | 82%         | 2e-123  | 84%   | <a href="#">HQ696002.1</a> |
| → Triticum durum HKT1;4-2 mRNA, complete cds                                             | 300       | 300         | 38%         | 3e-77   | 91%   | <a href="#">KF443079.1</a> |
| Triticum durum HKT1;4-1 mRNA, complete cds                                               | 300       | 300         | 38%         | 3e-77   | 91%   | <a href="#">KF443078.1</a> |
| Triticum monococcum putative sodium transporter HKT7-A2 (HKT7-A2) mRNA, complete cds     | 172       | 172         | 21%         | 6e-39   | 91%   | <a href="#">EF062819.1</a> |

### Alignments

Triticum aestivum partial mRNA for HKT protein (HKT1,4.1 gene)

Sequence ID: **emb|HG934161.1** Length: 331 Number of Matches: 1

Range 1: 1 to 331

| Score         | Expect   | Identities   | Gaps      | Strand    | Frame |
|---------------|----------|--------------|-----------|-----------|-------|
| 529 bits(286) | 3e-146() | 316/331(95%) | 0/331(0%) | Plus/Plus |       |

Features:

```
Query 91  GTACCTGCCTCCATACACCACATGGTTTCCATTTGAGGAGAGCTCGGGCGAGAAGGACCA 150
Sbjct 1   GTACCTGCCTCCATACACCACATGGTTTCCATTTGAGGAGAGCTCGGGCGTGAAGGACCA 60
```

```

Query 151 TCCCACGGAGGAGACCCCGGGGGTCAGGTTGCTCAAGAGCACGGCTCTGTCACTCAACTCTC 210
Sbjct 61 TCCCACGGAGGAGACCCAGGGGAGCAGGTTGCTCAAGAGCACGGCTCTGTCACTCAACTCTC 120
Query 211 CTACCTCGCCATCTTCATCATCGCCATCTGCGTCACCGAAAAGGGAAAACCTCGAGGAAAA 270
Sbjct 121 CTACCTCGCCATCTTCATCATCGCCATCTGCGTCACCGAGAGGGAAAACCTCGAGGAAAA 180
Query 271 CCCCCCAACTTCAGCTTGCTCAGCATCGTCGTGCGAAGTCGTCAGGCAAGCCCCCTCTAA 330
Sbjct 181 CCCCCCAACTTCAGCTTGCTCAGCATCGTCGTGCGAAGTCGTCAGGCAAGCCCCCTCTAA 240
Query 331 CGCaaatcaaaaaagccagaaaacgaataaaaaTATGACTGCTTCTTACTTCCGGCGTT 390
Sbjct 241 CGCAAAATCAAGAAAGCCTGAAAACGAATAACAAATATGACTGCAACTTAGTTCCGGCATT 300
Query 391 GTTGGTTTCCCTTCATGGAAGATGACATGTTT 421
Sbjct 301 ATTGGTTTCCCTTCATGGAAGCTGACATAATTT 331

```

Hordeum vulgare subsp. spontaneum high-affinity K+ transporter 4 gene, complete sequence  
Sequence ID: **gb|HQ696002.1** Length: 2473 Number of Matches: 1  
Range 1: 487 to 964

| Score         | Expect   | Identities   | Gaps       | Strand    | Frame |
|---------------|----------|--------------|------------|-----------|-------|
| 453 bits(245) | 2e-123() | 409/487(84%) | 15/487(3%) | Plus/Plus |       |

Features:

```

Query 91 GTACCTGCCTCCATACACCACATGGTTTCCATTTGAGGAGAGCTCGGGCGAGAAGGACCA 150
Sbjct 487 GTACCTGCCTCCATACACGACATGGTTTCCATTTCCAAGAGAGCTCCATCGTGGCAGACCA 546
Query 151 TCCCACGGAGGAGACCCCGGGGGTCAGGTTGCTCAAGAGCACGGCTCTGTCACTCAACTCTC 210
Sbjct 547 CCCCACGAAGGAGACCCAGGGGCTCAGGCTGCTCAAGAGCGGCTTCTGTCACTCAACTCTC 606
Query 211 CTACCTCGCCATCTTCATCATCGCCATCTGCGTCACCGAAAAGGGAAAACCTCGAGGAAAA 270
Sbjct 607 CTACCTCGCCATCTTCGTCGTCGCCATCTGCGTCACCGAGAGGGAAAACCTAGAGGAAGA 666
Query 271 CCCCCCAACTTCAGCTTGCTCAGCATCGTCGTGCGAAGTCGTCAGGCAAGCCCC-TTCTA 329
Sbjct 667 CCCGCTCAACTTCAGCTTGCTCAGCGTCGTCGTCCAAGTCGTCAGGCACGCCCACTCCA 726
Query 330 ACGCaaatcaaaaaagccagaaaacgaataaa-aaaTATGACTGCTTCTTACTTCCGGCG 388
Sbjct 727 AAGCAAAATC-GAGAA-CCTGAAAACGAATAAAGACGAAT-ACAGCTTC--A-TTCCTGC- 779
Query 389 TTGTTGGTTTCCCTTCATGGAAG--A--TGACATGTTTTATCCTTCACATTCGGGAGTGCG 444
Sbjct 780 --GTTGATTTCCCTTCATGGAAGGAAGCTGACATGTTTTGTCTTTCACATTCGCGAGCGCT 837
Query 445 GATGGAAATGGGGGCTTCTCCATGGGCTACGGTTGCAATTGACAGATCAGCCCGGACTGG 504
Sbjct 838 TACGGAAATGTGGGCTTCTCCATGGGCTACAGCTGCAGTAGACGGATCAACTGGACCGG 897
Query 505 CTGTGCACCGACGGGTGGACCGGCTTCGTCGGGAGGTGGAGCGATTCTGGCAAGCTCATC 564
Sbjct 898 GTGTGCGCCGACAGGTGGACCGGCTTCGCCGGAAGGTGGAGCGATTCTGGCAAGCTCATC 957
Query 565 CTCATTC 571
Sbjct 958 CTCATTC 964

```

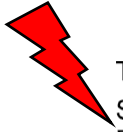

Triticum durum HKT1;4-2 mRNA, complete cds

Sequence ID: **gb|KF443079.1|** Length: 1686 Number of Matches: 1

Range 1: 1263 to 1487

| Score         | Expect  | Identities   | Gaps      | Strand    | Frame |
|---------------|---------|--------------|-----------|-----------|-------|
| 300 bits(162) | 3e-77() | 204/225(91%) | 0/225(0%) | Plus/Plus |       |

Features:

|       |      |                                                               |      |
|-------|------|---------------------------------------------------------------|------|
| Query | 91   | GTACCTGCCTCCATACACCACATGGTTTCCATTTGAGGAGAGCTCGGGCGAGAAGGACCA  | 150  |
| Sbjct | 1263 | GTACCTCCCTCCATACACGACATGGTTTCCATTTGGAGAGAGCTCCAGCGTGAAGGACCA  | 1322 |
| Query | 151  | TCCCACGGAGGAGACCCCGGGGGTCAAGTTGCTCAAGAGCACGGCTCTGTACAACCTCTC  | 210  |
| Sbjct | 1323 | TCCCACGGAGGAGACCCAGGGGGTGAAGTTGCTCAAGAGCACGCTTCTGTACAACCTCTC  | 1382 |
| Query | 211  | CTACCTCGCCATCTTTCATCATCGCCATCTGCGTCACCGAAAGGGAAAACCTCGAGGAAAA | 270  |
| Sbjct | 1383 | CTACCTTGCCATCTTTGTTCATCGCCATCTGCGTCACTGAGAGGGAAAAGCTCAAGGAGGA | 1442 |
| Query | 271  | CCCCCTCAACTTCAGCTTGCTCAGCATCGTCGTCGAAGTCGTCAG                 | 315  |
| Sbjct | 1443 | CCCCCTCAACTTCAACTTGCTCAGCATCGTCGTCGAAGTCGTCAG                 | 1487 |

Triticum durum HKT1;4-1 mRNA, complete cds

Sequence ID: **gb|KF443078.1|** Length: 1692 Number of Matches: 1

Range 1: 1269 to 1493

| Score         | Expect  | Identities   | Gaps      | Strand    | Frame |
|---------------|---------|--------------|-----------|-----------|-------|
| 300 bits(162) | 3e-77() | 204/225(91%) | 0/225(0%) | Plus/Plus |       |

Features:

|       |      |                                                               |      |
|-------|------|---------------------------------------------------------------|------|
| Query | 91   | GTACCTGCCTCCATACACCACATGGTTTCCATTTGAGGAGAGCTCGGGCGAGAAGGACCA  | 150  |
| Sbjct | 1269 | GTACCTGCCTCCATACACGACGTGGTTTCCATTTGAAGAGAGCTCCGGCGTCAAGGACCA  | 1328 |
| Query | 151  | TCCCACGGAGGAGACCCCGGGGGTCAAGTTGCTCAAGAGCACGGCTCTGTACAACCTCTC  | 210  |
| Sbjct | 1329 | ACCCAGGGAGGAGACCCAGGGGGTCAAGCTGCTCAAGAGCACGCTTCTGTACAACCTCTC  | 1388 |
| Query | 211  | CTACCTCGCCATCTTTCATCATCGCCATCTGCGTCACCGAAAGGGAAAACCTCGAGGAAAA | 270  |
| Sbjct | 1389 | CTACCTCGCCATCTTTGTTCATCGCCATCTGCATCACCGAGAGGGAAAAGCTCAAGGAGGA | 1448 |
| Query | 271  | CCCCCTCAACTTCAGCTTGCTCAGCATCGTCGTCGAAGTCGTCAG                 | 315  |
| Sbjct | 1449 | CCCCCTCAACTTCAACTTGCTCAGCATCGTCGTCGAAGTCGTCAG                 | 1493 |
