# Supplementary material for: Salt-Induced Tissue-Specific Cytosine Methylation Downregulates Expression of HKT Genes in Contrasting Wheat (Triticum aestivum L.) Genotypes
Source: PubMed Central journal article supplement — DNA Cell Biol. 2017 Apr 1;36(4):283–94. doi: 10.1089/dna.2016.3505 (PMC5385449; doi:10.1089/dna.2016.3505), 2017-04-01
Supplement: Supp_Figure2.pdf [file Supp_Figure2.pdf]

**Supplementary Figure S2:** Alignment of (A) nucleotide sequences of *TaHKT1;4.3* & *TaHKT1;4.2* (last-quarter of gene body) and (B) amino acid sequences of TaHKT1;4.3 & TaHKT1;4.2 from HD-2329 (HD) and Kharchia-65 (Kh).

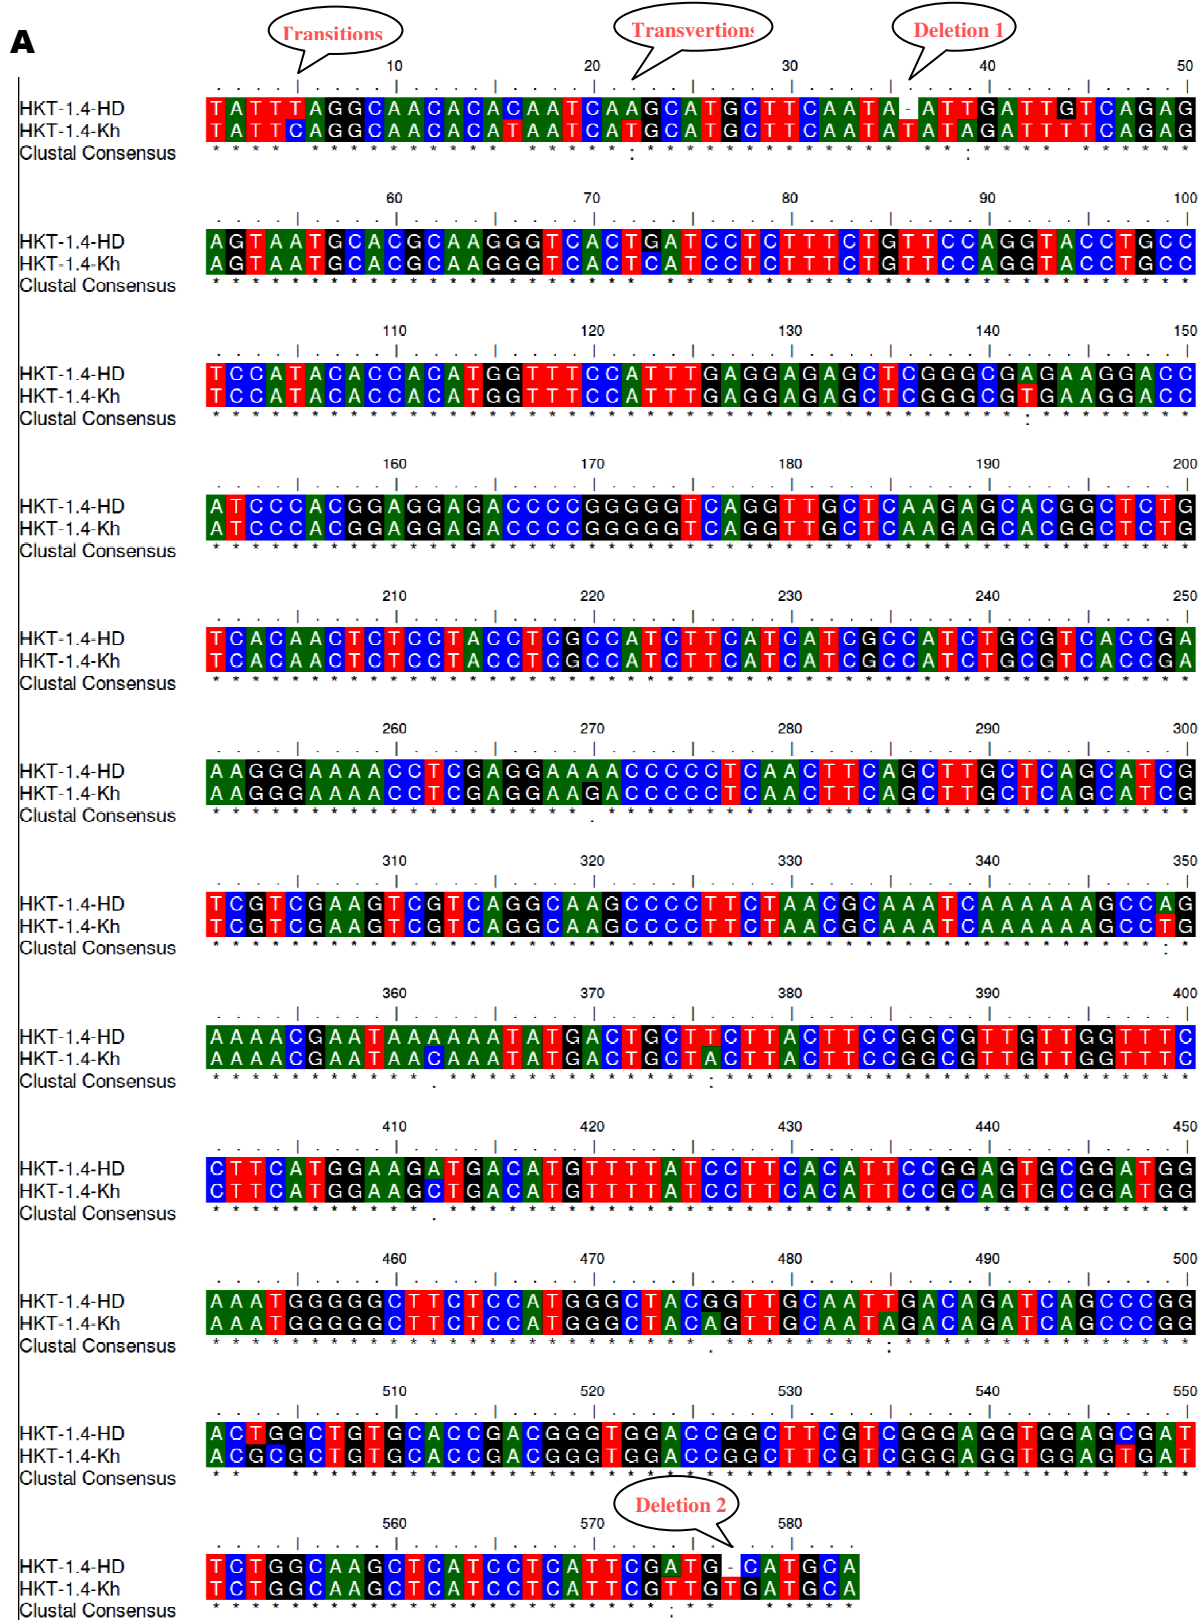

HKT-1.4-HD= nucleotide sequence of *TaHKT1;4.3* in HD-2329; and HKT-1.4-Kh= nucleotide sequence of *TaHKT1;4.2* in Kharchia-65.

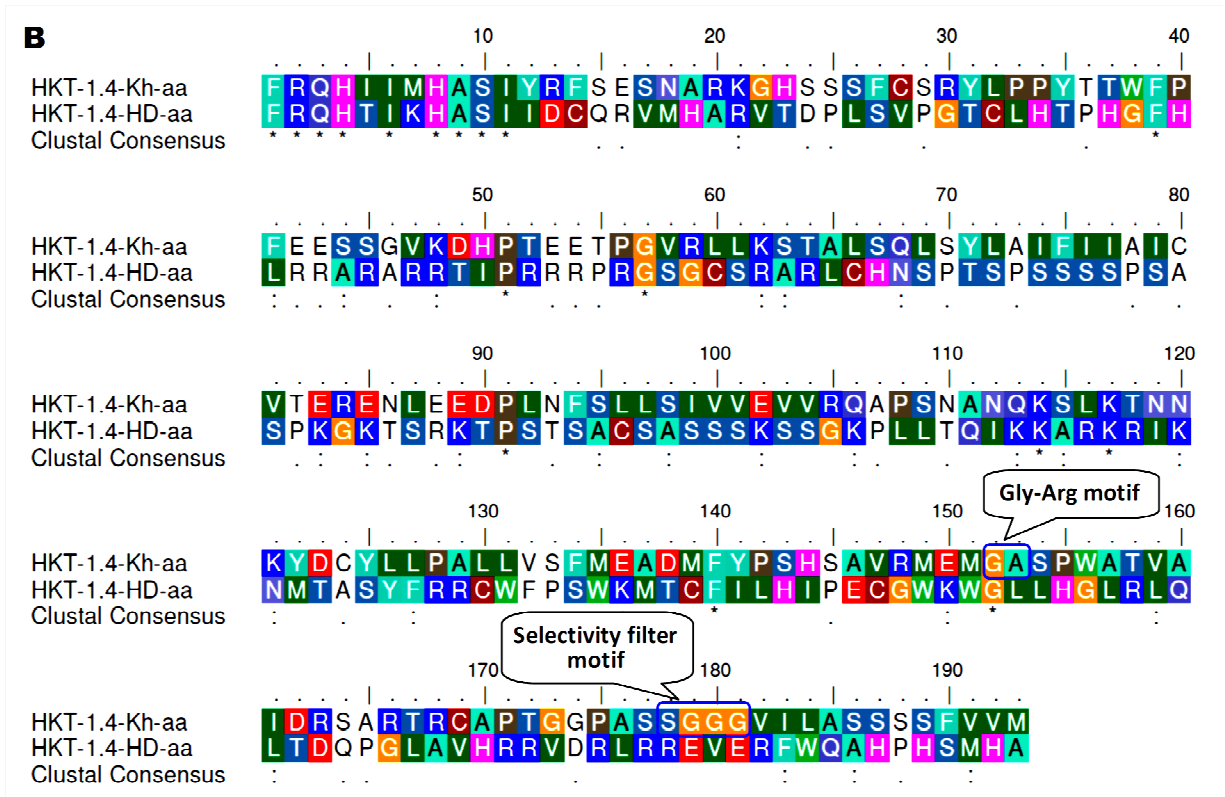

HKT-1.4-Kh-aa= amino acid sequence of TaHKT1;4.2 in HD-2329; and HKT-1.4-HD-aa= amino acid sequence of TaHKT1;4.3 in Kharchia-65.
