# Supplementary material for: Salt-Induced Tissue-Specific Cytosine Methylation Downregulates Expression of HKT Genes in Contrasting Wheat (Triticum aestivum L.) Genotypes
Source: PubMed Central journal article supplement — DNA Cell Biol. 2017 Apr 1;36(4):283–94. doi: 10.1089/dna.2016.3505 (PMC5385449; doi:10.1089/dna.2016.3505), 2017-04-01
Supplement: Supp_Figure3.pdf [file Supp_Figure3.pdf]

**Supplementary Figure S3:** Alignment of bisulfite sequences of *TaHKT1;4* gene along with the reference (unmodified) DNA sequences in shoot (Sh) and root (Rt) of Kharchia-65 (Kh) and HD-2329 (HD) grown under control (C) and salt stress (T) conditions.

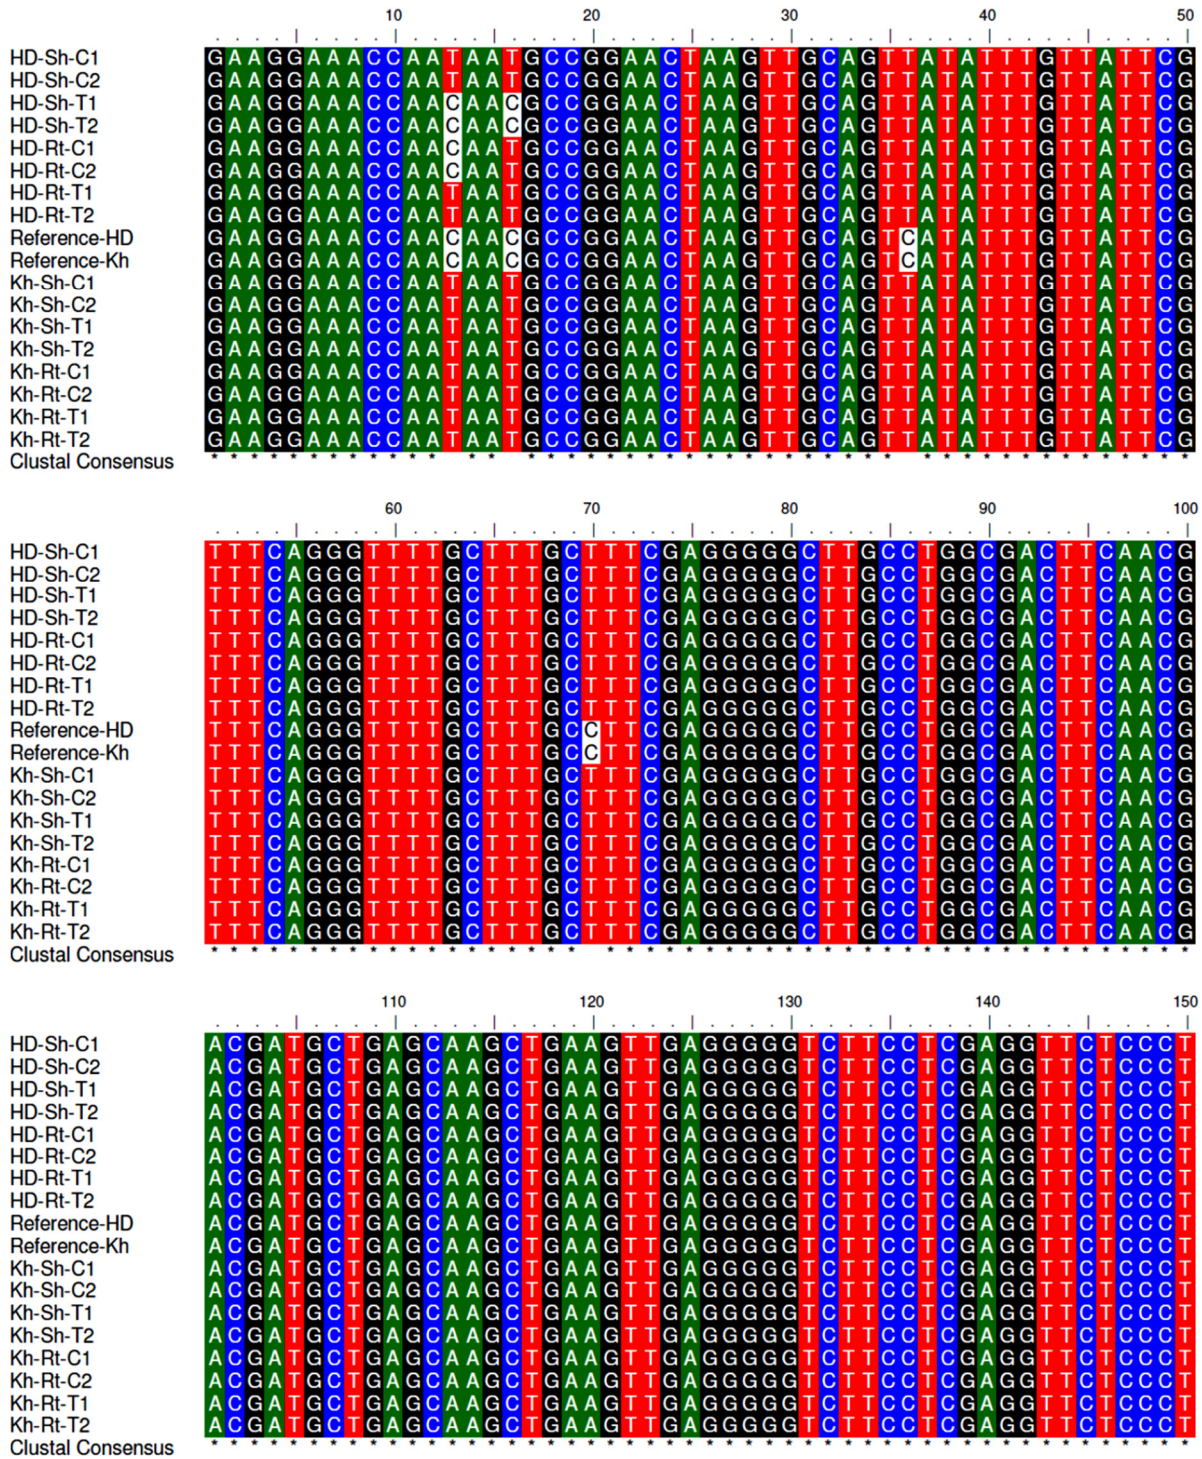

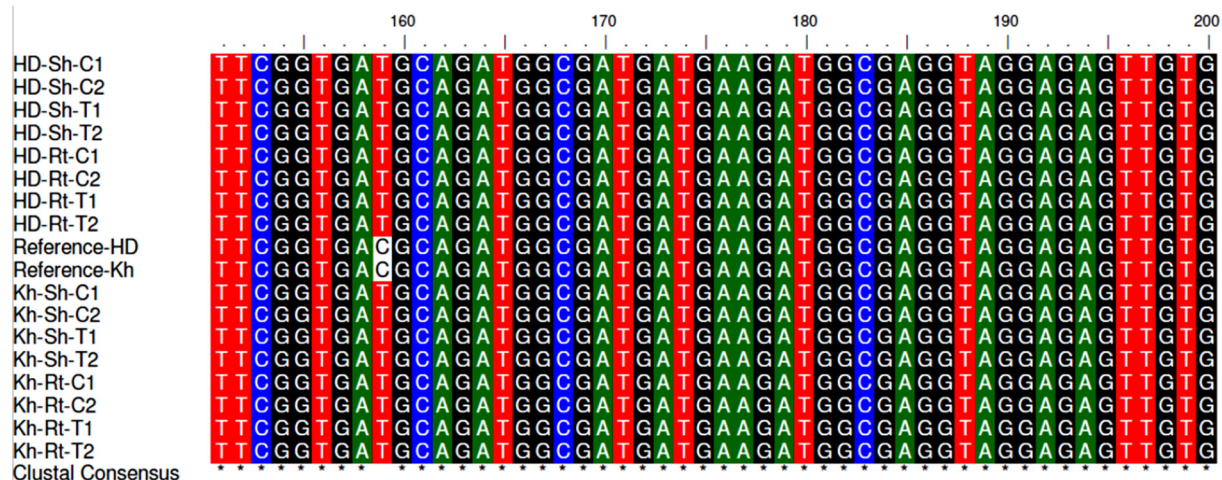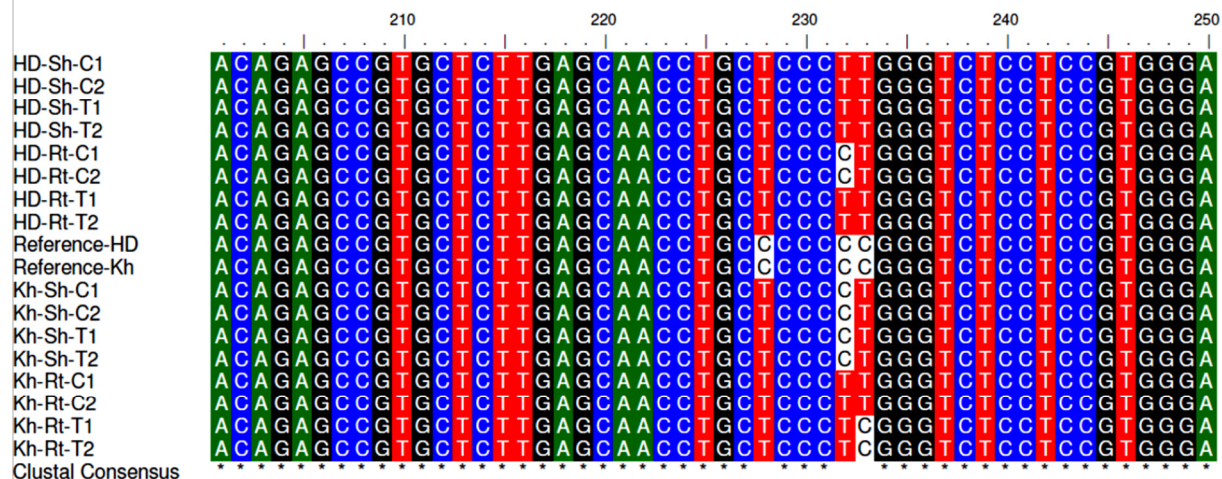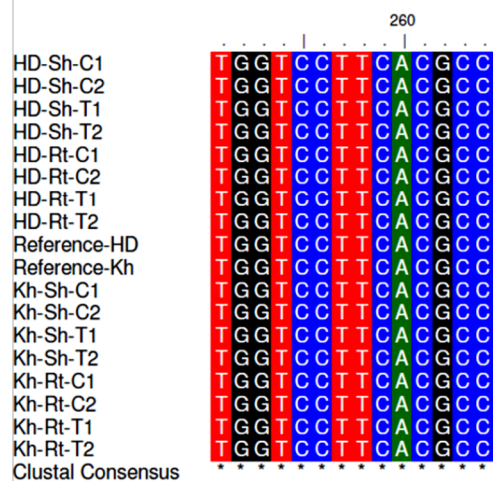

Bisulfate sequences in duplicate only were used for alignment.
